# Supplementary material for: Global Analysis of Photosynthesis Transcriptional Regulatory Networks
Source: PLoS Genet. 2014 Dec 11;10(12):e1004837. doi: 10.1371/journal.pgen.1004837 (PMC4263372; doi:10.1371/journal.pgen.1004837)
Supplement: S1 Table — FnrL target genes identified by ChIP-seq analysis of R. sphaeroides cells grown photosynthetically. (XLS) [file pgen.1004837.s006.xls]

## Sheet: Sheet1
Table S1: FnrL target genes identified by ChIP-seq analysis of R. sphaeroides cells grown photosynthetically
S/N†	Genea	Annotation	Chromosome	Peak start	Peak stop	FCb	Motif start	Motif pvalue	Motif sequence	Regulationc
1	RSP_0021d	30S ribosomal protein S9	chr1	1722800	1723199	6.4	1722853	1.73e-06	TTGATGTCGGACAT	-
							1722997	3.88e-07	TTGCGCGAGATCAT
							1723162	7.58e-06	TTGATGACGATGAC
2	RSP_0100-12*	nuoA-N (NADH dehydrogenase)	chr1	1811600	1812599	34.1	1812207	4.67e-07	CTGATGCAGATCAA	+
3	RSP_0146-7d	glnB-glnA1 (Nitrogen regulatory protein P-II)	chr1	1859600	1859999	3	1859730	1.54e-06	GTGACCGAGGTCAA	+
4	RSP_0166*	TraR-like protein	chr1	1881800	1882599	78.1	1882413	2.95e-08	TTGATGCAGGTCAA	+
5	RSP_0281-76*	bchEJGP (Bacteriochlorophyll biosynthesis)	chr1	2007400	2008199	49.3	2007816	2.4e-07	TTGATGCATGTCAA	+
6	RSP_0317*	hemN (Coproporphyrinogen III oxidase)	chr1	2047000	2047599	51	2047244	1.11e-06	TTGCGCAGGATCAA	+
7	RSP_0374-8d	ABC basic amino acid transporter	chr1	2103800	2104399	4.6	2104074	3.87e-08	ATGATCCTCATCAA	+
8	RSP_0466-4*	Hypothetical protein	chr1	2201200	2201999	61.19	2201632	4.75e-09	TTGATGTAGGTCAA	+
	RSP_0467-8	ubiD (3-octaprenyl-4hydroxybenzoate decarboxylase)								+
9	RSP_0695-3	ccoOQP (Cbb3-type cytochrome c oxidase)	chr1	2438800	2439399	41.7	2439129	2.95e-08	TTGATCGACATCAT	+
10	RSP_0696-3*	ccoNOQP (Cbb3-type cytochrome c oxidase)	chr1	2440000	2440799	410.86	2440417	8.58e-09	TTGATCCTCATCAA	+
	RSP_0697*	Universal stress protein (Usp)					2440385	1.36e-07	TTGATCCATGTCAA	+
11	RSP_0698*	fnrL (Crp-Fnr regulatory protein)	chr1	2441600	2442599	453.36	2442182	1.34e-08	TTGATTCAGATCAA	-
	RSP_0699	hemZ (Coproporphyrinogen III oxidase)								+
12	RSP_0766-5d	polyphosphate kinase 2	chr1	2509000	2509399	3.37	2509195	1.38e-06	TTGACCAGGGTCAT	+
13	RSP_0775*	Class I monoheme cytochrome c	chr1	2518400	2518999	61.28	2518696	2.4e-07	TTGACGCAGATCAG	+
14	RSP_0820-RSP_6134*	cytochrome B561, hypothetical protein	chr1	2565800	2566399	85.7	2566094	1.34e-08	TTGATGCGGATCAA	+
15	RSP_0889-8d	glnK-amtB (Nitrogen regulatory protein P-II)	chr1	2637800	2638399	5.1	2638117	3.71e-07	TTGATCTCGGTCAC	+
16	RSP_1002-3d	Aspartate carbamoyltransferase	chr1	2760000	2760599	14.3	2760402	1.23e-07	ATGACCCAGATCAA
17	RSP_1043d	50S ribosomal protein L31	chr1	2804600	2804799	2.8	2804780	7e-08	TTGACGTCGATCAT
18	RSP_1243-2	Transcriptional regulator LacI family	chr1	3012800	3013199	6.3	3013043	7.61e-07	TTGAAGACGATCAA	+
19	RSP_1257-4*	Polyhydroxyalkanoic synthase	chr1	3026600	3027399	31.47	3027028	1.84e-08	TTGAGCAAGATCAA	+
20	RSP_1266-9	Potassium-transporting P-type ATPase	chr1	3032600	3033199	3	3032852	5.53e-06	CTGAGGCAGATCAT
21	RSP_1775	Hypothetical protein	chr1	359600	360399	5.15	360109	1.95e-06	TTGACCTCGATCGA
22	RSP_1819-7*	feoABC (ferrous iron transport protein)	chr1	408800	409399	50.25	409223	1.04e-07	TTGACGCGGATCAA	+
23	RSP_1826-9*	coxII-X-XI-III (Cytochrome c oxidase)	chr1	417600	418199	146.75	417975	1.34e-08	TTGATTCAGATCAA	-
24	RSP_1877-6*	coxI (Cytochrome c oxidase aa3 type)	chr1	476800	477399	17.67	477119	1.94e-09	TTGATCTGGATCAA	-
25	RSP_1949d	FeS assembly SUF system protein	chr1	547000	547399	15.32	547144	4.69e-08	GTGATCTGCATCAA	+
26	RSP_2041d	Hypothetical protein	chr1	635400	635799	2.39	635560	1.82e-07	ATGATTTTCATCAA
27	RSP_2134-6d	Cytochrome c-type biogenesis protein CcdA	chr1	735400	735799	5.07	735526	1.38e-06	TTGCGCCGGATCAA
							735575	8.14e-06	CCGATCCACGTCAA
28	RSP_2247*	fusA (Elongation factor G)	chr1	862400	863199	176.2	862812	1.42e-07	TTGATTCAGGTCAA	+
							862579	2.62e-06	GTGATGTCGATCAG
29	RSP_2331d	ppaZ (Blue copper protein)	chr1	957000	957599	22.2	957181	1.67e-05	TTGACTCACCGCAA	+
30	RSP_2337*	ccpA1	chr1	964200	964999	69.8	964492	1.82e-07	TTGATCTGCGTCAT	+
31	RSP_2395*	ccpA2 (BCCP, cytochrome c peroxidase)	chr1	1022200	1022799	96.2	1022541	2.2e-08	TTGATCTAAGTCAA	+
32	RSP_2507*	ompW (Outer membrane protein)	chr1	1152400	1152999	135.3	1152640	1.84e-08	TTGATCTGCGTCAA	+
33	RSP_2573*	Hypothetical protein	chr1	1217400	1218399	126.96	1217769	1.82e-07	TTGACGCAGGTCAA	+
34	RSP_2984*	hemA (5-aminolevulinate synthase)	chr1	1675800	1676399	51.45	1676046	5.36e-08	TTGATAAGGATCAA	+
35	RSP_3044*	dorS (DMSO/TMAO-sensor hybrid histidine kinase)	chr2	77800	78399	63.45	78069	4.24e-07	TTGACGTCAATCAA	+
36	RSP_3060-3d	Possible O-acetylserine synthase	chr2	100800	101399	22.17	101055	2.61e-05	TTGAGGCTTGTCAT	-
37	RSP_3307d	Hypothetical protein	chr2	367600	367999	13.47	367810	3.17e-07	TTGCCCTCGATCAA	+
38	RSP_3341d	BadM/Rrf2 family transcriptional regulator	chr2	403800	404199	6.8	403914	2.17e-06	TTGATTGCGATCAA	+
39	RSP_3375-3d	Membrane fusion protein/ABC efflux pump	chr2	440800	441199	5.3	440985	1.11e-06	TTGCGCCAGATCAT	-
40	RSP_3396-3	ABC opine/polyamine transporter	chr2	461000	461399	3.76	461144	1.23e-07	TTGATCGGGATCAT	+
41	RSP_3578	Putative gas vesicle synthesis protein	chr2	674000	674399	5.49	674158	2.38e-06	TAGAGATAGATCAT	-
42	RSP_3663-1d	TRAP-T family transporter	chr2	771600	771999	2.68	771762	1.38e-06	TAGAGATAGATCAT	-
43	RSP_3998d	Glycine betaine transporter	plasmidB	49600	50199	7.85	49888	2.4e-07	ATGATCTCGGTCAA	+
44	RSP_4121/RSP_4122	Hypothetical protein/hypothetical protein	plasmidC	87800	88399	4.18	88138	5.53e-06	GTGACGAAGGTCAA	+
45	RSP_4201-4*	Transcriptional regulator ArsR family	plasmidD	51400	51999	100.26	51739	4.69e-08	CTGATCCAGATCAA	+
46	RSP_6024	Hypothetical protein	chr1	486800	486999	2.93	486945	3.25e-06	TTGACTTCAATCAT	NA
47	RSP_6116*	Hypothetical protein	chr1	2206400	2207199	201.5	2206759	6.1e-06	TTGACTGAAGTCAA	NA
48	RSP_6142	Hypothetical protein	chr1	2739400	2739999	35.06	2739722	7.61e-07	ATGATCCCGGTCAA	NA
49	RSP_7211	RepB partitioning protein	plasmidC	71800	72399	20.4	72065	5.53e-06	ACGATCGACATCAT	NA
50	RSs2461	small RNA RSs2461	chr1	2598000	2598399	4.53	2598237	9.58e-07	TTGATCTCACGCAA	NA
51	RSs0019	small RNA RSs0019	chr2	28600	28999	2.59716	28843	1.83e-06	TTGACAGATGTCAA	NA
52			chr1	1177800	1178199	9.01	1178055	1.18e-05	GTGAGGCGGATCAT	NA
53			chr1	1282200	1282599	3.96	1282408	1.82e-07	TTGCTCCAGATCAT	NA
54	*		chr1	2193200	2193799	29.6	2193494	1.34e-08	TTGATGCGGATCAA	NA
55			chr1	403800	404199	4.08	403983	1.42e-07	TTGACCGAAATCAA	NA
56	*		chr1	792200	792799	84.4	792528	1.42e-07	TTGATACGCATCAA	NA
57			chr2	12800	13199	14.18	12987	7.61e-07	CTGACCGTGATCAA	NA
58			chr1	2306000	2306399	3.86	2306212	9.71e-07	TTGCGGTAGATCAG	NA
59			chr1	2710800	2711199	5.03	2710949	3.71e-07	TTGAGCTGGATCAG	NA
60			chr1	731200	731599	3.64	731382	7.61e-07	CTGACCGTGATCAA	NA
61			chr1	785400	785999	6	785643	7.33e-06	TTGACAAGTGTCAA	NA
62			chr2	95200	95599	4.67	95451	3.17e-07	TTGATCTCGGTCAG	NA
	* Previously identified by ChIP-chip analysis (Dufour et al. 2010).
	a Instances where the FnrL binding site could potentially regulate two operons is separated by a forward slash
	b Fold enrichment of the wild type ChIP sample over the ΔfnrL ChIP control.
	c Likely regulatory role of FnrL on these target operons based on change in gene expression between WT and ΔfnrL cells. + = positively regulated by FnrL. - = negatively regulated by FnrL. NA - Not applicable (i.e., these genes are not represented on the R. sphaeroides) Affymetrix gene chip).
	d New FnrL targets predicted in TRN and verified via ChIP-seq analysis. All ChIP-chip identified sites except RSP_6116 were also identified in the TRN
	† Some binding sites correspond to more than one operon.
