# Supplementary material for: Global Analysis of Photosynthesis Transcriptional Regulatory Networks
Source: PLoS Genet. 2014 Dec 11;10(12):e1004837. doi: 10.1371/journal.pgen.1004837 (PMC4263372; doi:10.1371/journal.pgen.1004837)
Supplement: S4 Table — PrrA binding sites identified by ChIP-seq analysis which did not meet criteria used for selecting direct PrrA targets. (XLSX) [file pgen.1004837.s009.xlsx]

## Sheet: Sheet1
Table S4: PrrA binding sites identified by ChIP-seq analysis which did not meet criteria used for selecting direct PrrA targets
Gene ID	Annotation	chrID	Peak start	Peak end	FC
RSP_1613-15	TRAP-T family transporter DctP subunit	chr1	211200	211399	2.12062
RSP_1621	Deoxyguanosinetriphosphate triphosphohydrolase-like protein	chr1	217800	218199	2.4982
RSP_1649	Possible transporter DMT superfamily	chr1	243600	243999	2.33391
RSP_1667	hypothetical protein	chr1	259000	259599	3.19398
RSP_1669	DNA-directed RNA polymerase subunit omega	chr1	260000	260399	2.05371
RSP_1680 | RSP_1681	phosphoenolpyruvate carboxykinase | two-component transcriptional regulator	chr1	272000	272399	2.2408
RSP_1710	30S ribosomal protein S12	chr1	303000	304199	2.9563
RSP_1716	50S ribosomal protein L3	chr1	308000	308199	2.07864
RSP_1719	50S ribosomal protein L2	chr1	309400	309999	2.26248
RSP_1737	30S ribosomal protein S13	chr1	319600	319999	2.51142
RSP_1848 | RSP_1849	pyruvate kinase | aspartate kinase	chr1	441400	441599	2.17202
RSP_1850	phosphoenolpyruvate-protein phosphotransferase PtsI(Ntr)	chr1	442600	442799	2.20247
RSP_1887	50S ribosomal protein L33	chr1	484800	485199	2.35517
RSP_1937	translation initiation factor IF-3	chr1	537000	537399	2.09161
		chr1	538400	538999	2.04773
RSP_1951	hypothetical protein	chr1	548800	548999	2.17856
		chr1	564400	564999	2.1722
RSP_2016	50S ribosomal protein L28	chr1	618200	618599	2.81196
RSP_2018	hypothetical protein	chr1	620000	620199	1.91902
RSP_2024	Cold shock protein cspA	chr1	623800	624399	2.62537
RSP_2038	possible acetyltransferase	chr1	633600	633999	2.43018
RSP_2072	Putative Phage-related Holin protein	chr1	666600	666999	2.10174
RSP_2091 | RSP_2093	Putative benzoate transporter BenE | Putative Mrp	chr1	691600	692999	3.00337
RSP_2095	hypothetical protein	chr1	694400	694999	3.51655
RSP_2111	D-alanine--D-alanine ligase	chr1	711400	711999	3.149
RSP_2114	cell division protein FtsZ	chr1	714800	714999	2.19231
RSP_2131	Ribonuclease E	chr1	732000	732599	2.45188
RSP_2190	hypothetical protein	chr1	798200	798399	2.48055
RSP_2193	predicted aminomethyltransferase tetrahydrofolate dependent	chr1	804400	804999	2.94341
RSP_2331 | RSP_2330	PpaZ a novel pseudoazurin precursor (Blue Copper Protein) | LeuA	chr1	956800	956999	2.66693
RSP_2401	putative 6-aminohexanoate-cyclic-dimer hydrolase	chr1	1029800	1030799	2.32515
RSP_2425	putative CarD-like transcriptional regulator	chr1	1055000	1056399	2.26801
RSP_2463	acyl carrier protein	chr1	1102800	1103399	2.65463
RSP_2547-48	exopolysaccharide production protein exoY	chr1	1190000	1190199	2.1372
RSP_2565	UDPG-pyrophosphorylase	chr1	1211400	1211599	2.09886
RSP_2613	fatty acid/phospholipid synthesis protein	chr1	1254400	1255399	2.12085
RSP_2647	SAM-dependent methyltransferase	chr1	1289800	1290199	2.66661
RSP_2653	ATPase AAA family	chr1	1297000	1297199	2.07978
RSP_2722-25	Cysteinyl-tRNA synthetase class Ia	chr1	1371400	1371599	1.93285
RSP_2750	hypothetical protein	chr1	1400800	1401199	3.81096
RSP_2770	hypothetical protein	chr1	1418400	1418799	2.29127
RSP_2773	hypothetical protein	chr1	1420600	1421399	2.53799
RSP_2778	hypothetical protein	chr1	1426400	1426799	2.23442
RSP_2860	30S ribosomal protein S2	chr1	1440800	1441199	2.21408
RSP_2857	D-beta-hydroxybutyrate dehydrogenase	chr1	1443800	1444399	2.22589
RSP_2843	RNA-binding protein Hfq	chr1	1464800	1465399	2.45714
RSP_2951	phosphoribosylformylglycinamidine synthase II	chr1	1632600	1632999	2.14269
RSP_0002	Histone-like nucleoid-structuring protein H-NS	chr1	1704800	1704999	2.02764
RSP_0037-38	Putative FlgM negative regulator of flagellin synthesis	chr1	1742400	1742799	1.69185
RSP_0123	Autoinducer synthesis protein	chr1	1837200	1837599	2.84936
RSP_0139	30S ribosomal protein S6	chr1	1854200	1854399	2.30047
RSP_0196	ATP-dependent protease ATP-binding subunit	chr1	1912200	1912599	2.3459
RSP_0334	hypothetical protein	chr1	2065000	2065199	2.0916
RSP_0382	poly-beta-hydroxybutyrate polymerase	chr1	2114600	2114999	2.15676
RSP_0386	Cold-shock DNA-binding domain protein	chr1	2119000	2119799	2.03119
RSP_0427-6	hypothetical protein	chr1	2161200	2161799	2.33314
RSP_0443	Rrf2 family transcriptional regulator	chr1	2175000	2175199	2.39014
RSP_0590	hypothetical protein	chr1	2332800	2333399	2.99883
RSP_0626	Putative Maf-like protein	chr1	2363800	2364399	2.70963
RSP_0672-69	Biopolymer transport protein TolQ	chr1	2413800	2413999	2.1496
RSP_0705/RSP_0706	Cytochrome cy/pheA	chr1	2451200	2451599	2.26746
RSP_0714	hypothetical protein	chr1	2461000	2461399	2.14751
RSP_0750	Geranylgeranyl pyrophosphate synthase/Polyprenyl synthetase	chr1	2492600	2492999	2.03316
RSP_0841	hypothetical protein	chr1	2591600	2593199	2.65181
RSP_0863	isopropylmalate isomerase large subunit	chr1	2615400	2615599	2.1071
RSP_0870	hypothetical protein	chr1	2618800	2619199	2.38011
RSP_0891	putative lipoprotein	chr1	2642200	2642399	2.29397
RSP_0927	transcriptional regulator LyrR family	chr1	2677200	2677399	2.0277
RSP_0965-62	alpha-ketoglutarate decarboxylase	chr1	2727200	2727599	2.84068
RSP_1038	F0F1 ATP synthase subunit A	chr1	2800800	2801599	3.33215
RSP_1044	50S ribosomal protein L19	chr1	2805200	2805599	2.94455
RSP_1053	Signal recognition particle protein ffh	chr1	2811600	2811999	2.95885
RSP_1151	NADH-ubiquinone oxidoreductase	chr1	2915800	2916399	5.47038
RSP_1158	PTS IIA-like nitrogen-regulatory protein PtsN	chr1	2919800	2920599	2.26965
RSP_1184	ribonuclease BN	chr1	2958200	2958599	2.9772
		chr1	2969400	2969599	2.31882
RSP_1230	tRNA modification GTPase TrmE	chr1	3003000	3003199	2.25779
RSP_1231	transcription termination factor Rho	chr1	3004000	3004399	3.0374
RSP_1342	chromosomal replication initiation protein	chr1	3109800	3110799	3.02679
RSP_1351-52	phosphoserine aminotransferase	chr1	3121000	3121399	3.18023
RSP_1383	hypothetical protein	chr1	3162400	3162799	2.78516
RSP_3819	Ribosomal protein L21	chr2	16200	16799	2.13199
		chr2	266800	266999	2.12128
RSP_3217	Cache sensor protein	chr2	277600	277799	2.33058
RSP_3392	ABC Fe3+-siderophores transporter periplasmic binding protein	chr2	457800	458199	2.22743
RSP_3590	30S ribosomal protein S1	chr2	683200	683799	2.01896
RSP_3621	Cold-shock DNA-binding protein	chr2	733000	733599	2.87991
		chr2	751000	751799	2.74343
		chr2	875400	875999	2.20896
		chr2	879600	880399	2.47843
RSP_3779	hypothetical protein	chr2	910800	911199	2.38832
RSP_4021	Replication protein C	plasmidB	22400	22799	2.20326
RSP_4051	hypothetical protein	plasmidC	2200	2999	2.81953
RSP_4086	hypothetical protein	plasmidC	46400	47399	2.20425
		plasmidC	50000	50399	2.51295
RSP_4100	Unannotated Gene	plasmidC	57000	57199	2.0723
RSP_4110	Glycosyl transferase family 2	plasmidC	66800	67199	4.3454
RSP_2484	hypothetical protein	plasmidC	70800	71199	2.06396
RSP_4111	Phytochrome sensor diguanylate cyclase/phosphodiesterase	plasmidC	76000	76199	2.31597
RSP_4127	ATP dependent lon ATPase	plasmidC	95000	95599	2.73696
		plasmidC	102200	102399	2.20088
		plasmidD	12600	12999	2.97333
RSP_4157-62	Radical SAM superfamily protein	plasmidD	16600	17999	2.7048
		plasmidD	28600	29199	3.02051
		plasmidD	29800	30399	3.48806
RSP_4186	RepA partitioning protein/ATPase ParA type	plasmidD	36800	36999	2.38475
RSP_7280	SpoVT/AbrB-like cell growth regulatory protein	plasmidD	37800	38199	3.49912
		plasmidD	38800	38999	3.09838
RSP_4190	Heme oxygenase	plasmidD	40800	40999	2.42771
		plasmidD	44400	45399	3.13394
		plasmidD	63000	63399	2.74733
		plasmidD	88200	88599	2.88322
