# Supplementary material for: Global Analysis of Photosynthesis Transcriptional Regulatory Networks
Source: PLoS Genet. 2014 Dec 11;10(12):e1004837. doi: 10.1371/journal.pgen.1004837 (PMC4263372; doi:10.1371/journal.pgen.1004837)
Supplement: S6 Table — Differentially expressed genes between ΔMppG+pIND5-mppG and ΔMppG during photosynthetic growth. (XLSX) [file pgen.1004837.s011.xlsx]

## Sheet: Sheet1
Table S6 - DE genes between ΔMppG+pIND5-mppG and ΔMppG during photosynthetic growth. Fold change represents increase/decrease in ΔMppG+pIND5-mppG w.r.t ΔMppG.
GeneID	Gene Annotation	FC	p-value
RSP_2888	Transcriptional regulator	53.1053	0.00724959
RSP_2785	Cytochrome c-554	-6.21935	0.0273957
RSP_0262	Chlorophyllide reductase BchX subunit	-4.5487	0.0186006
RSP_1565	AppA antirepressor of ppsR sensor of blue light	-4.53679	0.00678984
RSP_2961	Protein containing a CBS domain	-4.3067	0.0264151
RSP_2538	Short-chain dehydrogenase/reductase	-4.21255	0.0019617
RSP_4153	hypothetical protein	4.13475	0.0355567
RSP_0261	Chlorophyllide reductase BchY subunit	-3.79363	0.0197957
RSP_2395	BCCP cytochrome c peroxidase	3.62483	0.0154845
RSP_0270	Squalene/phytoene synthase	-3.56893	0.0442292
RSP_4246	putative SinR-like protein	3.53179	0.0406045
RSP_0263	Chlorophyll synthesis pathway bchC	-3.50427	0.00686427
RSP_0682	coproporphyrinogen III oxidase	-3.33706	0.00686427
RSP_4051	hypothetical protein	3.1869	0.0163802
RSP_0611	transcriptional regulator ArsR family	-3.05696	0.0317883
RSP_0692	iron-sulfur cluster-binding protein	-2.74622	0.00155618
RSP_0284	2-vinyl bacteriochlorophyllide hydratase	-2.5856	0.0264151
RSP_0271	Phytoene dehydrogenase	-2.5124	0.0136213
RSP_0315	Light-harvesting 1 (B870) complex assembly	-2.42192	0.0355567
RSP_0689	RdxS cytochrome oxidase maturation protein cbb3-type	-2.41502	0.0331155
RSP_3638	hypothetical protein	2.3407	0.0156846
RSP_1939	NADPH-ferredoxin reductase	-2.27229	0.0264151
RSP_3573	gas vesicle synthesis protein GvpA	2.24704	0.0123282
RSP_0043	chemotaxis response regulator CheY6	-2.17421	0.0393319
RSP_3718	hypothetical protein	-2.08941	0.0171465
RSP_1556	light-harvesting complex beta subunit	-1.98191	0.0142034
RSP_0069	Flagellar filament protein	-1.90165	0.0412057
RSP_2913	ABC Fe+3 siderophore transporter periplasmic substrate-binding protein	-1.88866	0.0120743
RSP_1692	hypothetical protein	-1.88492	0.0355567
RSP_3261	aminotransferase	-1.87994	0.0141886
RSP_0228	putative hemin transport protein	1.74827	0.0197957
RSP_2692	acyltransferase domain (LPS)	-1.69307	0.0243636
RSP_0174	short-chain dehydrogenase	-1.669	0.0106564
RSP_1256	enoyl-(acyl carrier protein) reductase	-1.66718	0.0197957
RSP_4131	two component transcriptional regulator LuxR family	1.6364	0.0142034
RSP_0850	hypothetical protein	1.6281	0.0355567
RSP_2864	Pentose-5-phosphate-3-epimerase	1.56295	0.0250061
